# Supplementary material for: Systematic Validation of RNF213 Coding Variants in Japanese Patients With Moyamoya Disease
Source: PubMed Central journal article supplement — J Am Heart Assoc. 2015 May 11;4(5):e001862. doi: 10.1161/JAHA.115.001862 (PMC4599414; doi:10.1161/jaha.115.001862), 2015-05-11
Supplement: jah30004-e001862-sd1.pdf [file jah30004-e001862-sd1.pdf]

## DATA SUPPLEMENT

Systematic validation of *RNF213* coding variants in Japanese patients with Moyamoya disease

Yosuke Moteki, MD<sup>1</sup>; Hideaki Onda, MD<sup>1</sup>; Hidetoshi Kasuya, MD<sup>2,5</sup>;  
Taku Yoneyama, MD<sup>1</sup>; Yoshikazu Okada, MD<sup>1</sup>; Kengo Hirota, MD<sup>2,5</sup>; Maki Mukawa,  
MD<sup>3</sup>; Tadashi Nariai, MD<sup>3</sup>; Shohei Mitani, MD<sup>4,5</sup>; PhD; Hiroyuki Akagawa, MD<sup>2,5</sup>

<sup>1</sup>Department of Neurosurgery, Neurological Institute, Tokyo Women's Medical University, Tokyo, Japan

<sup>2</sup>Department of Neurosurgery, Medical Center East, Tokyo Women's Medical University, Tokyo, Japan

<sup>3</sup>Department of Neurosurgery, Tokyo Medical and Dental University, Tokyo, Japan

<sup>4</sup>Department of Physiology, Tokyo Women's Medical University, Tokyo, Japan

<sup>5</sup>Tokyo Women's Medical University Institute for Integrated Medical Sciences (TIIMS)

Correspondence should be addressed to Akagawa H.  
(akagawa.hiroyuki@twmu.ac.jp)

## Supplemental Methods

### Confirmation of the rare sequence variants

Twenty-one out of the 30 rare variants detected in the present study were called as true genetic variants by the Variant Quality Score Recalibration (VQSR) [1] in the Exome Aggregation Consortium (ExAC, Cambridge, MA, URL: <http://exac.broadinstitute.org>, March 2015). All the rest of nine variants were patient-specific and confirmed by direct sequencing: three (p.Q3020L, p.R4062Q and p.E4750K) in our 103 MMD patients (Supplemental Figure III), two (p.M3891V and p.V4765M) by Kamada et al [2] and four (p.L1911I, p.Q3082R, p.W4024R and p.E4917K) by Miyatake et al [3].

The authors would like to thank the Exome Aggregation Consortium and the groups that provided exome variant data for comparison. A full list of contributing groups can be found at <http://exac.broadinstitute.org/about>.

### Haplotype phasing

In the present study, three individuals were identified to carry multiple rare missense variants (p.Q3020L, p.E4750K, and p.R4927Q together with p.R4810K). Of these, DNA samples of their parents were not available, except for the p.E4750K mutant. In order to determine whether their genotypes were compound heterozygous, we performed direct haplotyping using long range PCR covering the variants of interest, followed by subcloning.

PCR primers were designed to cover the genomic region between the p.R4810K and p.R4927Q loci (1,605bp) for the p.R4927Q mutant as follows:

Ex60-Ex63\_Forward (5'-CTCGCAGCCAGTCTCAAAGT-3');

Ex60-Ex63\_Reverse (5'-ACACACCAAATGAGCAGCAG-3').

The PCR product was then subcloned into the pMD20-T vector (Takara Bio Inc.) to divide diploid amplicons, and sequenced for haplotype phasing.

Since the genomic distance between the p.Q3020L and p.R4810K loci was too long to be amplified by single PCR (37,752bp), we combined computational phase inference using LD with proposed direct haplotyping for the p.Q3020L mutant. Within the p.Q3020L to p.R4810K interval, four common SNPs (rs35993981, rs8067292, rs6565681, and rs7223115) forming strong LD ( $|D'| > 0.8$ ) in 89 JPT subjects were selected from the 1000 genomes project database [4]. The p.Q3020L and p.R4810K loci were amplified with neighboring rs35993981 and rs7223115 loci, respectively, using the following PCR primers:

Q3020L-rs35993981\_Forward (5'-TGACTACTACAGCCTCATCAAATG-3');

Q3020L-rs35993981\_Reverse (5'-CTGGGAGAGATTTAACAAGGATCTA-3');

rs7223115-R4810K\_Forward (5'-TGGAACAGCAAGTACTCTTCACATA-3');

rs7223115-R4810K\_Reverse (5'-AGCTTCTAATATGTTTTTGGGGTTC-3').

Direct haplotyping was performed within each amplicon, as described above. We genotyped these four interval SNPs in our 103 MMD patients, and each haplotype phase was then computed using BEAGLE version 3.3.2 [5].

### Violin plots of C scores across various subsets of missense changes

Differences in C scores between the candidate variants and other missense changes with specific functional consequences were visualized using violin plots. Five functional categories were set as follows.

i) *Benign*

We extracted ancestral chimpanzee (PanTro4) alleles that were altered and fixed in the human lineage with allele frequencies >99% for the benign missense set. A total of 4,330 of these autosomal missense changes were obtained.

ii) *GWAS*

We downloaded the National Human Genome Research Institute (NHGRI) genome-wide association study (GWAS) catalog (<http://www.genome.gov/gwastudies/>) [6] on September 15, 2014. A total of 327 autosomal missense SNPs with trait associations were obtained.

iii) *MMD*

We selected 15 candidate variants for MMD susceptibility according to the VT test (C score >10.02, Fisher's exact test  $P < 0.05$ , Figure 1A).

iv) *Gain-of-function*

We searched the distinct gain-of-function missense variants curated in the Online Mendelian Inheritance in Man (OMIM) database (<http://omim.org>). A total of 107 autosomal OMIM genes were identified that contained the search words "gain of function" or "gain-of-function" in the ALLELIC VARIANTS field. We extracted a total of 91 autosomal missense variants specified as gain-of-function variants from the variants listed.

v) *Loss-of-function*

In the same manner as described above, a total of 130 autosomal OMIM genes were identified that contained nonsense variants together with the search words "loss of function" or "loss-of-function" in the ALLELIC VARIANTS field. We extracted a total of 61 autosomal missense variants specified as loss-of-function variants from the variants listed.

The C-scores of these five functional categories were compared using the Kruskal-Wallis test followed by the post hoc Steel-Dwass test.

*Subordinate comparisons of the GWAS SNPs and the candidate variants for MMD*

Among the 327 GWAS SNPs extracted in the previous section, 125 SNPs were reported to be binary trait loci with odds ratios (ORs). In cases where a SNP reported in more than one study, a median OR was employed in the following analysis. These 125 SNPs were subdivided according to first and second quartiles of ORs. We also

selected nine trait-associated loci of cardiovascular and cardiovascular diseases (e.g. coronary heart disease, stroke) by reason of similar conditions as MMD. From the remaining quantitative trait loci, we selected ten loci associated with serum LDL cholesterol levels. C-scores of the subdivided SNPs were compared with that of the 15 candidate variants for MMD using Steel's test.

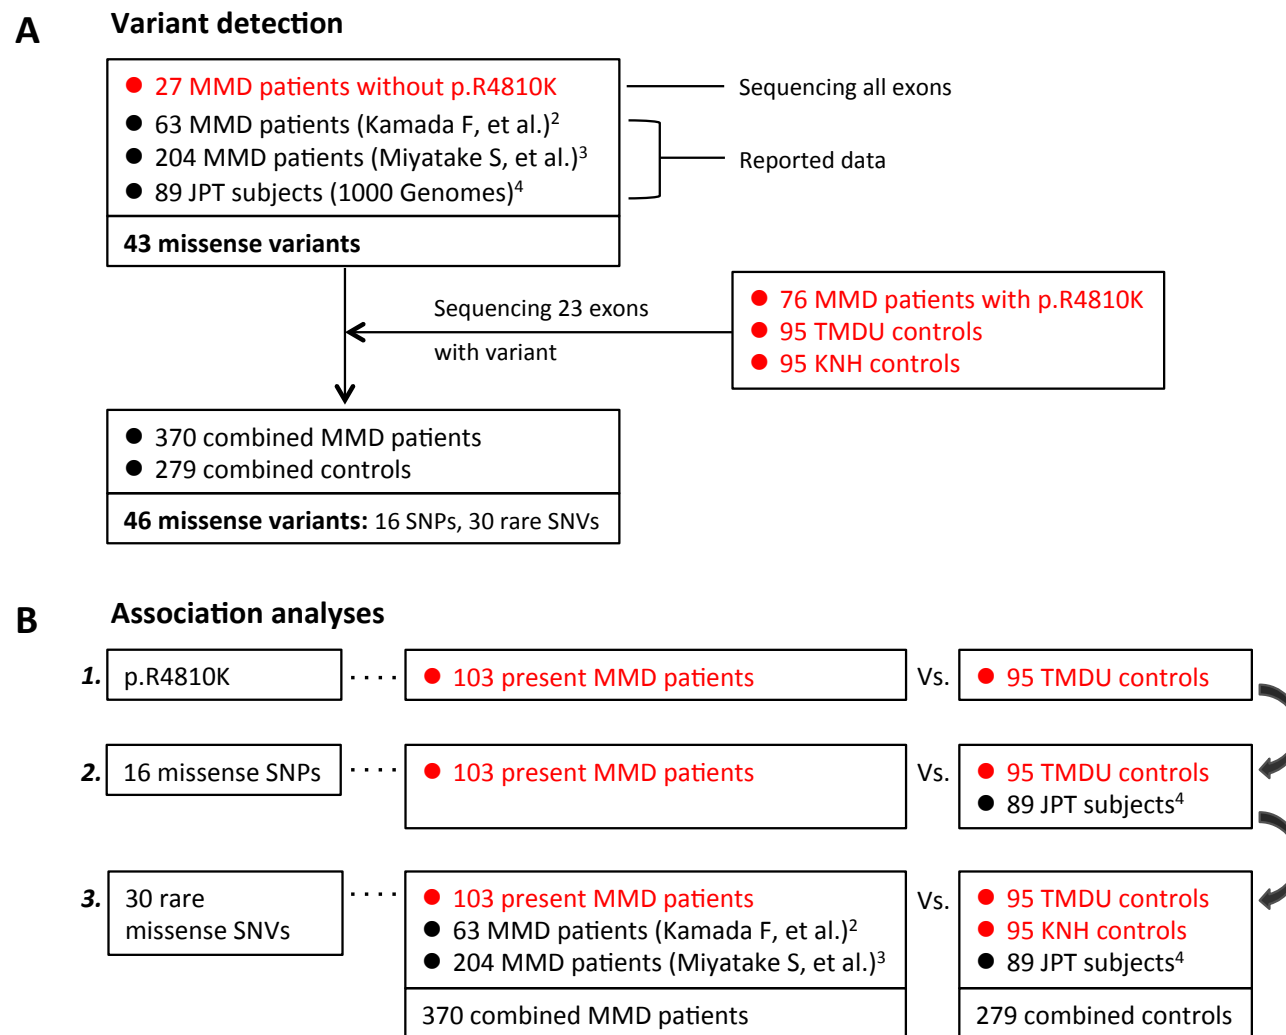

**Supplemental Figure 1:** Flowchart describing the present study. (A) The samples used for variant detection of *RNF213*. (B) Depending on the genotypic frequencies in the patients, analytical samples were increased in stages. Red letters indicate the present DNA samples in hand. SNP: single nucleotide polymorphism, SNV: single nucleotide variant.

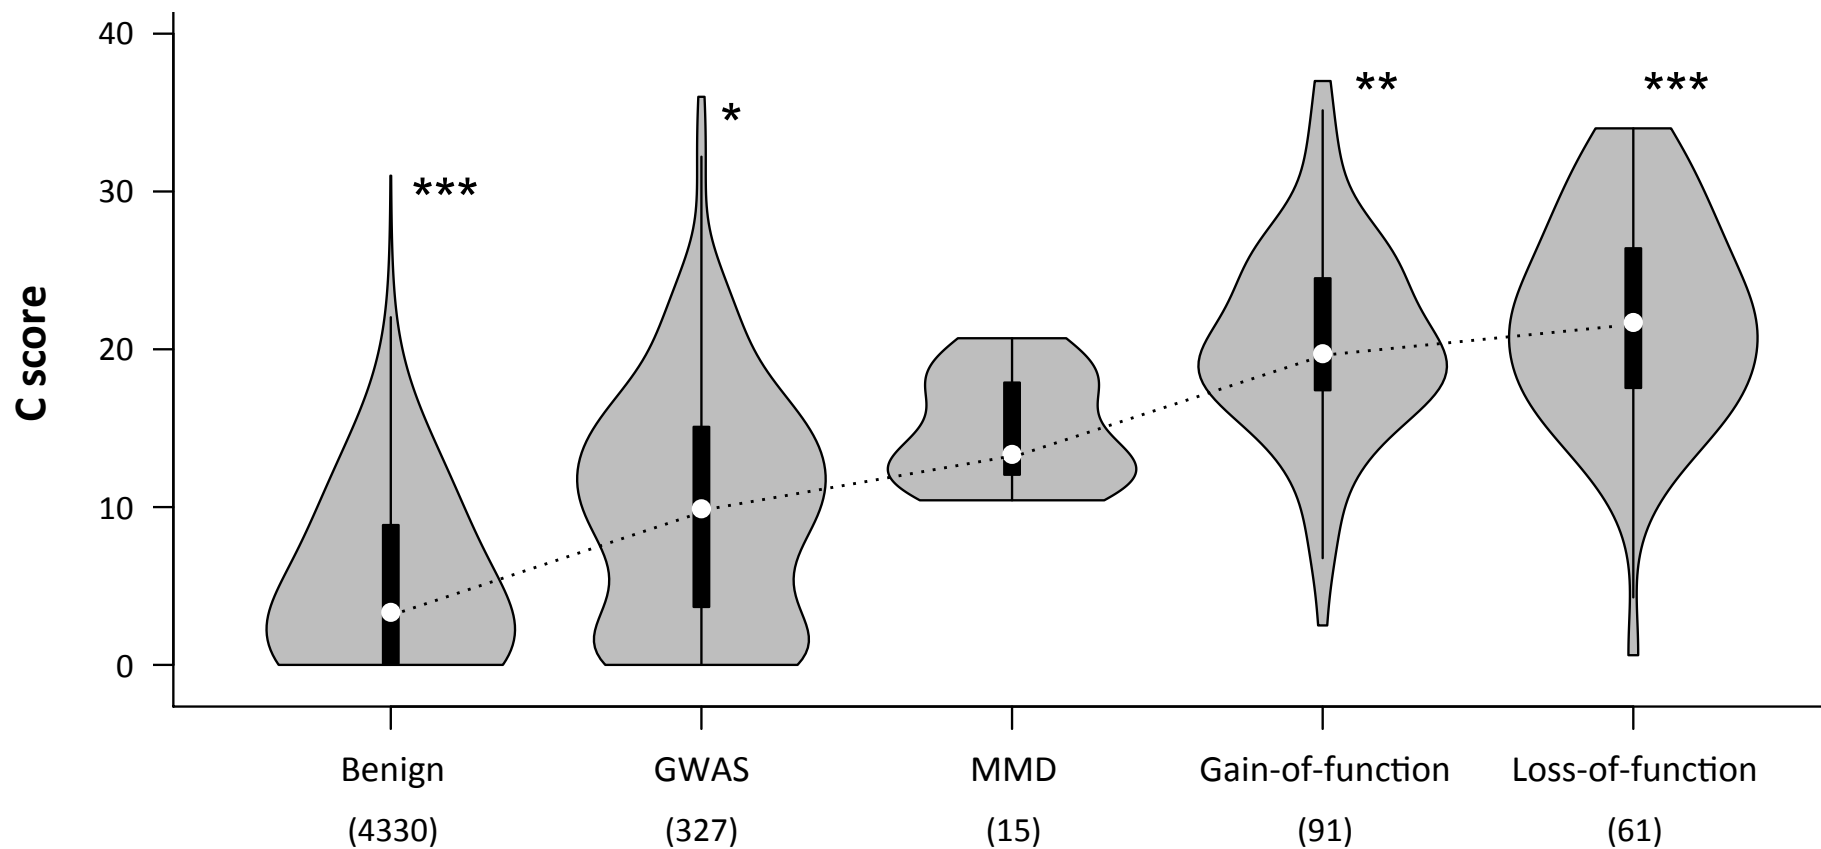

**Supplemental Figure II:** Violin plots of C scores across various functional categories of missense changes. Benign represents ancestral chimpanzee alleles altered in the human lineage; GWAS, listed in the GWAS catalogue [6]; Loss-of-function and Gain-of-function, curated in the OMIM database. Steel-Dwass test \* $P < 0.05$ , \*\* $P < 0.005$  and \*\*\* $P < 0.0005$ , significantly different from the MMD candidate variants.

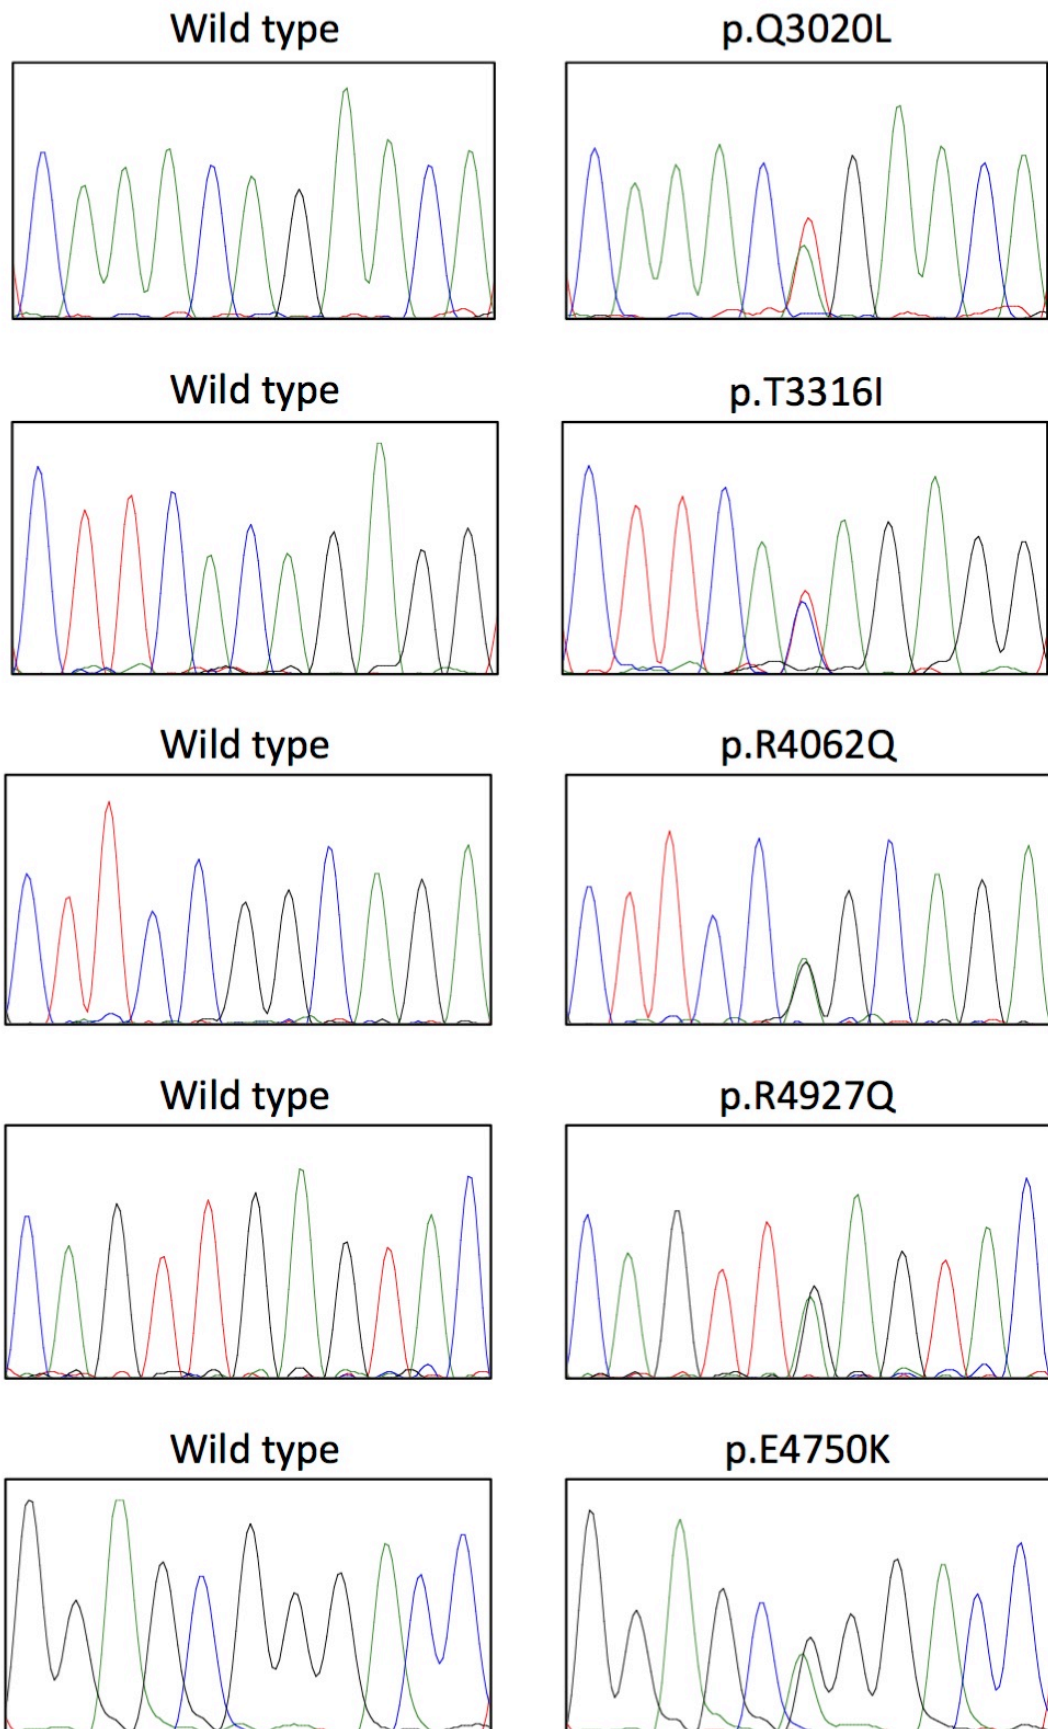

**Supplemental Figure III:** Chromatograms of five rare missense variants among our 103 MMD patients that were absent in the controls.

**A**

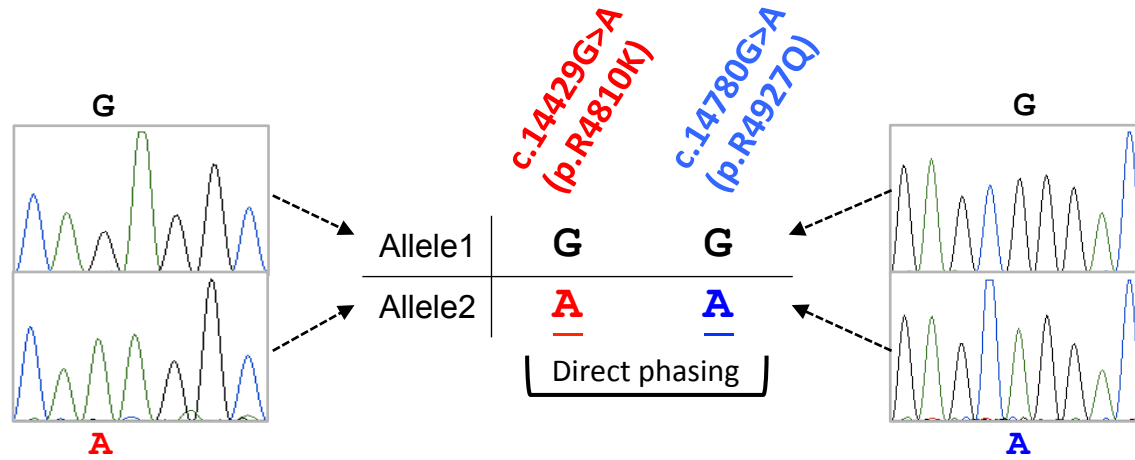

**B**

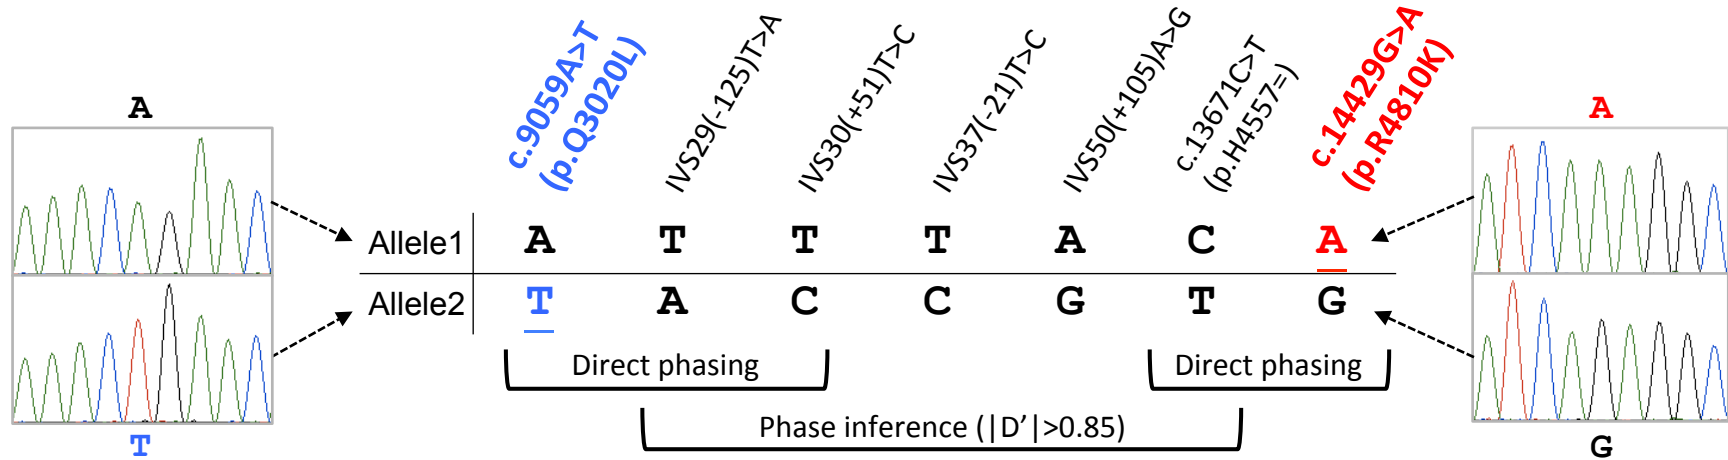

**Supplemental Figure IV:** Haplotype phasing for patients harboring multiple rare variants. (A) Direct haplotype phasing for patients harboring p.R4810K and p.R4927Q. (B) In patients harboring p.Q3020L and p.R4810K, interval phase inference using tight LD was combined with direct phasing.



**Supplemental Table I. Primer sequences for exon resequencing of *RNF213*.**

| No. | Name     | Forward primer (5' -> 3') | Reverse primer (5' -> 3') | Product size |
|-----|----------|---------------------------|---------------------------|--------------|
| 1   | exon1    | GCTGTGATTTCACTTTTCGCA     | TGGAAGGGAGGTGAGACATC      | 295          |
| 2   | exon2    | CGTGGGGAGGATTTCTGTT       | GATTTTCCTGGGCAGAGTGA      | 298          |
| 3   | exon3    | TGGGGTCTTTGCGAGTCTAC      | GGAGCATTCTGCCCAAATA       | 260          |
| 4   | exon4    | TCGAGCCAAGCTTGATGTAG      | AAGCAACGCCAGCACCTT        | 740          |
| 5   | exon5    | CTCGGCTTGTGGCAGATG        | CATGACCTTCCCAGACACCT      | 539          |
| 6   | exon6    | AAGGGTCGTGAACATTCTGG      | ACTAGAAGGGCAGCCTGGAT      | 695          |
| 7   | exon7-1  | GCATGTTTGCTAGGGTGTGA      | TCCCCAAATTCTTCTCCTCC      | 452          |
| 8   | exon7-2  | AGGAGTCACCGTGTTCCTCC      | TCCAGAACCCGAAGAATGTC      | 573          |
| 9   | exon8    | GCACTCCATGCTACGTTTGA      | ACCAACCAGAGACACAACCC      | 468          |
| 10  | exon9    | TCAGTTGGAGGAGTCTGGCT      | CCACAGAGTCAAGGGGTCAT      | 548          |
| 11  | exon10   | CTCTCACAGGTGTGGTGGTG      | TTGCCTGTGTGCTTTTCAGTC     | 489          |
| 12  | exon11   | CTTGCTTCCTGTTGGGACTC      | ACTCCGGGTGCACAATGTAG      | 352          |
| 13  | exon12   | GGACTGTTTCTGTCCCTCCA      | GTGAAAGGAAGAATGGCAGC      | 758          |
| 14  | exon13   | TCGTAGCTGCCATTCTTCT       | GGAGAGACTGCATCGTGCTT      | 310          |
| 15  | exon14   | AAGGTCAAACAAATGCCCTG      | TTGAAATCCGCACCTATCC       | 329          |
| 16  | exon15   | GTAGCCACTCCTTGAGCAGC      | ACCAACCATCACCATCACCT      | 522          |
| 17  | exon16   | TTGATGAAGGTTGGGGAGAG      | GTTCTCCAGCTTGCCTTCAC      | 287          |
| 18  | exon17   | GGGCCAGGAGAAGCTTAAAA      | GAGCTTCCTCATGTGGCATT      | 776          |
| 19  | exon18   | TTTGCTCTTTTTGTGGCCTT      | ATCTTCTGCCTCCCACCTTT      | 387          |
| 20  | exon19   | TGCCTGTGTTTGAGGAAGTG      | ACAAAATGCACACGCAAAC       | 376          |
| 21  | exon20   | CTAGTCCTTCTCCTGGTGGC      | TGAGAGCCCTCAACTTTGTTC     | 298          |
| 22  | exon21-1 | TGTGTGCTCTTGAGTTCGCT      | CTCTGCAAGGGTGACCTCTC      | 503          |
| 23  | exon21-2 | TGCTCAGAGACAGCCACATC      | TCTGGCTAAGGAGCAGTGGT      | 676          |
| 24  | exon22   | AAGAGCTTGGTGTGCCTGTT      | GATCAGTGCCCATCTCCCTA      | 474          |
| 25  | exon23   | GATTACTGCCCAAGACCGAG      | GTCACTGCCCTAACGTTGCT      | 363          |
| 26  | exon24   | GACCACAGGAGGGAGAAGG       | GGGGAAATCTGTGAAGAGCA      | 326          |
| 27  | exon25   | GGCATCTATGTGATCCAGGC      | TTCTTGGGAGTACACAGCCC      | 384          |
| 28  | exon26-1 | CCTGTGTGCTGTTGCAGAGT      | GGTGCAGTTGCTTTTGATGA      | 455          |
| 29  | exon26-2 | AGATTTGTGACCCAGAAGCG      | TTTGCATGTAGACAGCCAGG      | 487          |
| 30  | exon26-3 | CTCCCGCTGATGCTCTTATC      | GCTGGTAGTCTTCTCGGTGC      | 487          |
| 31  | exon26-4 | CTTTGAGGAGGTGGCACTGT      | ATACCCATTGTGGGAGACCA      | 573          |
| 32  | exon27-1 | TGTCCTAGCCCTGGGACTTA      | CTTCTGATACTGCGCATCCA      | 778          |
| 33  | exon27-2 | GTGAAGAGGTTGCACGACAA      | GGGGACCACGTCTTTACTGA      | 233          |
| 34  | exon28-1 | CTCAGTAAGTGCCCTCCAGC      | CCTTTCCAGGATTTCAACGA      | 658          |
| 35  | exon28-2 | GTGCAGACTGGAATTTGGGT      | AGTCTCCTAAACGCGCCAT       | 248          |
| 36  | exon29-1 | CGTGGAGGGTTAAGACACAAA     | CTAACCCCATCCATGGTGAC      | 588          |
| 37  | exon29-2 | CCTCTCTCTTCTGCAATCCG      | GTCTGCAGTTGTTCTCCGT       | 683          |
| 38  | exon29-3 | CTGTGGGAAAACAGGCTTA       | CGTGGAAACCACCTGAAAAT      | 689          |
| 39  | exon29-4 | TCAGCCTAGATGAAAACGGG      | GTACTGCTGCAGGTCCTTCC      | 698          |

|    |           |                        |                       |     |
|----|-----------|------------------------|-----------------------|-----|
| 40 | exon29-5  | GAAGATTCCCCTCTTCCTGG   | ACAGCCTGTGCAATGTCTTG  | 666 |
| 41 | exon29-6  | GCTCCTCAGACATCCTCGTC   | TGGTTGAGTGCCTCGTAGAG  | 600 |
| 42 | exon29-7  | CCCCAAGGACCAAGAGTACA   | CAGGTGTGCCTGAAGGAAAT  | 691 |
| 43 | exon29-8  | CAGAAGGTGTCTGAGGAGGC   | CTACTCCCCACACTTACCGC  | 367 |
| 44 | exon30    | TCCTTTGGGTTTGGATTCTG   | TGACTGTGGCGCTCATTAAC  | 385 |
| 45 | exon31    | ATGTTTCCCATCACTTTGGG   | GCGGGGAAGAATTGTTATT   | 311 |
| 46 | exon32    | GAACCAACAGCTCGGAGAAC   | AAGAGGTGAGGAGCTTGCCT  | 800 |
| 47 | exon33    | GCGCAGCAAGATAATGACAA   | AGTTCTGCAGATGTGTCCCC  | 369 |
| 48 | exon34    | TGATCTCTCATCTGGGGACC   | ACTGTGTGAGGAAAGTGGGG  | 445 |
| 49 | exon35    | CCCCACTTTCCTCACACAGT   | CACACAGTGAAATGATGCC   | 455 |
| 50 | exon36    | GAGGTGGGACAGAAGCACTC   | TGTGCTTCTTGGGGAAAAC   | 371 |
| 51 | exon37    | CAAAATGTCAAAGGTGGCA    | GGGCCTGCTGTGTTCTGAT   | 325 |
| 52 | exon38    | TCTGAGAAGAGCTGGCATCA   | GGTGACGTAATTGGACGCT   | 397 |
| 53 | exon39    | ACGAGCTCCCATTCAACAAG   | GCAAGCTCTACACCTGACCC  | 314 |
| 54 | exon40    | GTGACCTTAACGTGGGAGGA   | CAGAAGCTCTCCATTCCCAG  | 468 |
| 55 | exon41    | CTGGGAATGGAGAGCTTCTG   | CAGATGAAGCAGTGGGTGAG  | 457 |
| 56 | exon42    | GACACCGAGTCCCAGCTAAG   | TCTTCCTTTCGGAAAAGGGT  | 385 |
| 57 | exon43    | CCCCTGACAAGCAGCATAAT   | GCAGAGAAACTGGCCAGAAG  | 378 |
| 58 | exon44    | TGTGAATGCAAGGAGACAGC   | CCTCTGGTGAGGACCTTTGT  | 600 |
| 59 | exon45    | CGGGTGAGAGGAGTGACTTG   | ACTGAGCGGATGACAGGAGT  | 771 |
| 60 | exon46    | GAGATGCTGCCAGAGTAGG    | TAACAAAACGCTGCGATGA   | 279 |
| 61 | exon47    | CCAGATCTGAGAGAACCAGGA  | CTGCACGGAACAGAGCATT   | 270 |
| 62 | exon48    | CTGTAGAAGCTTGGGGCATC   | GAGGGGATGTAGAAAAGCCC  | 401 |
| 63 | exon49    | GGGCTTTTCTACATCCCCTC   | GAAGCTCTGAGGTGAGTGCC  | 698 |
| 64 | exon50    | CCTCGAATGATCAACCACCT   | GGGCACGTGACTTCCAATAC  | 372 |
| 65 | exon51    | GCCCTTAGGTAGATCTGGCA   | AAATCACCACCATTTGAGGG  | 794 |
| 66 | exon52    | AAAATTTCCCCTCAAATGG    | CTACAGTGACAAGCTCTGGGG | 444 |
| 67 | exon53    | GTCCAGCAGAAGGAAAGCAG   | CGGTAGAATGCAGGTGGTTT  | 329 |
| 68 | exon54    | AACAAATTAGCGTGGGATGC   | CCACCCCTCAAACCCTATCT  | 212 |
| 69 | exon55    | ACACTGGGACAATCTGAGGG   | GCTGGAATAAAAACAGCCA   | 288 |
| 70 | exon56    | GAACATGGTCCAGGCTTTGT   | AAAGGACTCCCTGGGAAGAA  | 374 |
| 71 | exon57    | CCTCTACCAGGCTCACCATC   | CATTCTTCCAGCAACAGCA   | 381 |
| 72 | exon58    | TCAAAGGTCATTAAGTTGGTGG | GCTCAGTCAAAGGCTCTTGC  | 397 |
| 73 | exon59    | CCACTGGTGGAGTTACTGGG   | GAACTCTGCACCGAAAGAGG  | 383 |
| 74 | exon60    | CTCGCAGCCAGTCTCAAAGT   | ATGTTTTTGGGGTTCAAGCA  | 381 |
| 75 | exon61    | TGCACAAAGCAGGAAAGATG   | AACACAGTGCTGGGTGTTGA  | 300 |
| 76 | exon62    | GCATCAAAGGGAGCTGAAA    | CACTGGGCTTAGGGACTCTG  | 419 |
| 77 | exon63    | CCACTGCTCCAAGTGTGAGA   | ACACACCAAATGAGCAGCAG  | 345 |
| 78 | exon64    | GCACTACGCTGCAGTTTTCC   | CACTGAGAAGGCAGAAAGCC  | 230 |
| 79 | exon65    | CTCGGCTCTTTACCAGGTG    | TGTCTCCCCATCCTTTTCAG  | 393 |
| 80 | exon66,67 | ACAGGGCAGAACGAAGAGAA   | CAGGAAATGGGATTCTGTGG  | 599 |
| 81 | exon68    | TTACACACGTGAGCCACCAT   | AACAGCTCGGCTTTCAAAA   | 398 |

**Supplemental Table II. Clinical features of subjects harboring rare missense variants other than p.R4810K.**

| Pedigree-Individual ID | Ethnicity | Gender | Age at onset | <i>RNF213</i> genotype | <i>RNF213</i> variant | Phenotype     | Onset      | Surgical treatment | Familial history of MMD (relationship to the proband) |
|------------------------|-----------|--------|--------------|------------------------|-----------------------|---------------|------------|--------------------|-------------------------------------------------------|
| 1-1                    | Japanese  | Female | 21           | compound heterozygote  | Q3020L<br>R4810K      | Bilateral MMD | TIA        | yes                | no                                                    |
| 2-1                    | Japanese  | Female | 43           | heterozygote           | T3316I<br>-           | Bilateral MMD | infarction | yes                | no                                                    |
| 3-1                    | Japanese  | Male   | 8            | heterozygote           | R4062Q<br>-           | Bilateral MMD | TIA        | yes                | yes<br>(proband)                                      |
| 3-2                    | Japanese  | Male   | -            | heterozygote           | R4062Q<br>-           | non MMD       | -          | -                  | yes<br>(father of 3-1)                                |
| 3-3                    | Japanese  | Female | 8            | heterozygote           | R4062Q<br>-           | Bilateral MMD | TIA        | yes                | yes<br>(paternal aunt of 3-1)                         |
| *4-1 <sup>7</sup>      | German    | NA     | NA           | heterozygote           | R4062Q<br>-           | MMD           | NA         | NA                 | NA                                                    |
| 5-1                    | Japanese  | Female | 1            | compound heterozygote  | E4750K<br>R4810K      | Bilateral MMD | TIA        | yes                | no                                                    |
| 5-2                    | Japanese  | Female | -            | heterozygote           | E4750K<br>-           | non MMD       | -          | -                  | yes<br>(mother of 5-1)                                |
| 5-3                    | Japanese  | Male   | -            | heterozygote           | R4810K<br>-           | non MMD       | -          | -                  | yes<br>(father of 5-1)                                |
| 6-1                    | Japanese  | Male   | 19           | heterozygote           | R4810K, R4927Q<br>-   | Bilateral MMD | TIA        | yes                | no                                                    |

\*The German MMD patient reported by Liu W et al.<sup>7</sup> NA = not available, TIA = transient ischemic attack.

## References

1. DePristo MA, Banks E, Poplin R, Garimella KV, Maguire JR, Hartl C, Philippakis AA, del Angel G, Rivas MA, Hanna M, McKenna A, Fennell TJ, Kernytzky AM, Sivachenko AY, Cibulskis K, Gabriel SB, Altshuler D, Daly MJ. A framework for variation discovery and genotyping using next-generation DNA sequencing data. *Nat Genet.* 2011;43:491-498.
2. Kamada F, Aoki Y, Narisawa A, Abe Y, Komatsuzaki S, Kikuchi A, Kanno J, Niihori T, Ono M, Ishii N, Owada Y, Fujimura M, Mashimo Y, Suzuki Y, Hata A, Tsuchiya S, Tominaga T, Matsubara Y, Kure S. A genome-wide association study identifies *RNF213* as the first Moyamoya disease gene. *J Hum Genet.* 2010;56:34-40.
3. Miyatake S, Miyake N, Touho H, Nishimura-Tadaki A, Kondo Y, Okada I, Tsurusaki Y, Doi H, Sakai H, Saitsu H, Shimojima K, Yamamoto T, Higurashi M, Kawahara N, Kawauchi H, Nagasaka K, Okamoto N, Mori T, Koyano S, Kuroiwa Y, Taguri M, Morita S, Matsubara Y, Kure S, Matsumoto N. Homozygous c.14576G>A variant of *RNF213* predicts early-onset and severe form of moyamoya disease. *Neurology.* 2012;78:803-810.
4. 1000 Genomes Project Consortium, Abecasis GR, Auton A, Brooks LD, DePristo MA, Durbin RM, Handsaker RE, Kang HM, Marth GT, McVean GA. An integrated map of genetic variation from 1,092 human genomes. *Nature.* 2012;491:56–65.
5. Browning SR, Browning BL. Rapid and accurate haplotype phasing and missing data inference for whole genome association studies using localized haplotype clustering. *Am J Hum Genet.* 2007;81:1084-1097.
6. Welter D, MacArthur J, Morales J, Burdett T, Hall P, Junkins H, Klemm A, Flicek P, Manolio T, Hindorff L, Parkinson H. The NHGRI GWAS Catalog, a curated resource of SNP-trait associations. *Nucleic Acids Res.* 2014;42:D1001-D1006.
7. Liu W, Morito D, Takashima S, Mineharu Y, Kobayashi H, Hitomi T, Hashikata H, Matsuura N, Yamazaki S, Toyoda A, Kikuta K, Takagi Y, Harada KH, Fujiyama A, Herzig R, Kirschek B, Zou L, Kim JE, Kitakaze M, Miyamoto S, Nagata K, Hashimoto N, Koizumi A. Identification of *RNF213* as a susceptibility gene for moyamoya disease and its possible role in vascular development. *PLoS One.* 2011;6:e22542.
